# Supplementary material for: A Mouse Model of Chronic West Nile Virus Disease
Source: PubMed Central journal article supplement (PMC5091767; doi:10.1371/journal.ppat.1005996), 2016-11-02
Supplement: ppat.1005996.s004.pdf [file ppat.1005996.s004.pdf]

**Supplementary Table 2. Pathway analysis enrichment for Purple, Magenta, Green-Yellow, and Yellow Modules.**

| <b>Module</b> | <b>Pathway name</b>                                                       | <b>Pathway uploaded gene count</b> | <b>Pathway p-value</b> | <b>Pathway p-value corrected</b> | <b>Gene symbols</b>                                                                       |
|---------------|---------------------------------------------------------------------------|------------------------------------|------------------------|----------------------------------|-------------------------------------------------------------------------------------------|
| Purple        | Natural killer cell mediated cytotoxicity                                 | 5                                  | 7.45E-06               | 2.31E-04                         | Gzmb; Klrd1; Klrk1; Ncr1; Prf1;                                                           |
|               | Graft-versus-host disease                                                 | 3                                  | 2.48E-04               | 0.003841339                      | Gzmb; Klrd1; Prf1;                                                                        |
|               | Cytochrome P450 - arranged by substrate type                              | 2                                  | 0.010995312            | 0.048693526                      | Cyp4f18; Ncoal1;                                                                          |
|               | Allograft rejection                                                       | 2                                  | 0.006302683            | 0.048845793                      | Gzmb; Prf1;                                                                               |
| Magenta       | Hepatitis C                                                               | 10                                 | 1.42E-12               | 4.53E-11                         | Eif2ak2; Gm14446; Ifit1; Irf7; Irf9; Oas1a; Oas1g; Oas2; Oas3; Stat1;                     |
|               | Interferon Signaling                                                      | 8                                  | 1.33E-11               | 2.12E-10                         | Ifit1; Irf7; Irf9; Oas1a; Oas2; Oas3; Oasl1; Usp18;                                       |
|               | Interferon gamma signaling                                                | 6                                  | 1.58E-09               | 1.69E-08                         | Irf7; Irf9; Oas1a; Oas2; Oas3; Oasl1;                                                     |
|               | Immune System                                                             | 14                                 | 1.53E-08               | 1.23E-07                         | C2; Dtx3l; Ifih1; Ifit1; Irf7; Irf9; Oas1a; Oas2; Oas3; Oasl1; Tlr7; Trim25; Usp18; Zbp1; |
|               | Cytokine Signaling in Immune system                                       | 8                                  | 3.85E-08               | 2.46E-07                         | Ifit1; Irf7; Irf9; Oas1a; Oas2; Oas3; Oasl1; Usp18;                                       |
|               | TRAF3-dependent IRF activation pathway                                    | 3                                  | 4.41E-06               | 2.35E-05                         | Ifih1; Irf7; Trim25;                                                                      |
|               | TRAF6 mediated IRF7 activation                                            | 3                                  | 3.03E-05               | 1.38E-04                         | Ifih1; Irf7; Trim25;                                                                      |
|               | RIG-I-like receptor signaling pathway                                     | 4                                  | 3.47E-05               | 1.39E-04                         | Dhx58; Ifih1; Irf7; Trim25;                                                               |
|               | NF-kB activation through FADD/RIP-1 pathway mediated by caspase-8 and -10 | 2                                  | 3.45E-04               | 0.001227619                      | Ifih1; Trim25;                                                                            |

|              |                                                          |   |             |             |                                      |
|--------------|----------------------------------------------------------|---|-------------|-------------|--------------------------------------|
|              | RIG-I/MDA5 mediated induction of IFN-alpha/beta pathways | 3 | 5.67E-04    | 0.001814866 | Ifih1; Irf7; Trim25;                 |
|              | Cytosolic DNA-sensing pathway                            | 3 | 6.58E-04    | 0.001913587 | Adar; Irf7; Zbp1;                    |
|              | Interferon alpha/beta signaling                          | 2 | 7.99E-04    | 0.001965845 | Irf9; Usp18;                         |
|              | TRAF6 mediated IRF7 activation in TLR7/8 or 9 signaling  | 2 | 7.99E-04    | 0.001965845 | Irf7; Tlr7;                          |
|              | Antiviral mechanism by IFN-stimulated genes              | 2 | 0.00143258  | 0.002865161 | Ifit1; Usp18;                        |
|              | ISG15 antiviral mechanism                                | 2 | 0.00143258  | 0.002865161 | Ifit1; Usp18;                        |
|              | TRAF6 mediated NF-kB activation                          | 2 | 0.00158062  | 0.002975284 | Ifih1; Trim25;                       |
|              | Innate Immune System                                     | 6 | 0.001346877 | 0.003078576 | C2; Ifih1; Irf7; Tlr7; Trim25; Zbp1; |
|              | Toll-like receptor signaling pathway                     | 3 | 0.002746939 | 0.004626423 | Irf7; Stat1; Tlr7;                   |
|              | Negative regulators of RIG-I/MDA5 signaling              | 2 | 0.002614411 | 0.004647841 | Ifih1; Trim25;                       |
|              | Cytosolic sensors of pathogen-associated DNA             | 2 | 0.014502922 | 0.023204675 | Irf7; Zbp1;                          |
|              | MyD88 dependent cascade initiated on endosome            | 2 | 0.019982214 | 0.029065038 | Irf7; Tlr7;                          |
|              | Toll Like Receptor 7/8 (TLR7/8) Cascade                  | 2 | 0.019982214 | 0.029065038 | Irf7; Tlr7;                          |
|              | Toll Like Receptor 9 (TLR9) Cascade                      | 2 | 0.021468569 | 0.029869314 | Irf7; Tlr7;                          |
| Green-yellow | Initial triggering of complement                         | 2 | 1.57E-04    | 0.001415559 | C1qb; Cfp;                           |
|              | Complement cascade                                       | 2 | 4.99E-04    | 0.002246038 | C1qb; Cfp;                           |
|              | Amino sugar and nucleotide sugar metabolism              | 2 | 0.00133385  | 0.003001163 | Gnpda1; Renbp;                       |
|              | Innate Immune System                                     | 4 | 0.001115641 | 0.003346924 | C1qb; Cfp; Myo10; Tlr4;              |
|              | Chagas disease (American trypanosomiasis)                | 2 | 0.005875128 | 0.010575231 | C1qb; Tlr4;                          |
|              | Immune System                                            | 4 | 0.013038267 | 0.019557401 | C1qb; Cfp; Myo10; Tlr4;              |
|              | Metabolism of lipids and                                 | 3 | 0.018020105 | 0.023168707 | Abcc3; Lpin1; Ptgs1; c               |

|                                             |                                                        |             |             |                 |                                                                                                     |
|---------------------------------------------|--------------------------------------------------------|-------------|-------------|-----------------|-----------------------------------------------------------------------------------------------------|
|                                             | lipoproteins                                           |             |             |                 |                                                                                                     |
| Yellow                                      | Protein processing in endoplasmic reticulum            | 14          | 3.95E-14    | 3.52E-12        | Ckap4; Derl3; Edem1; Edem2; Hsp90b1; Hspa5; Hyou1; Lman1; Pdia6; Sec24d; Sel1l; Ssr2; Txndc5; Xbp1; |
|                                             | ATF6-alpha activates chaperone genes                   | 3           | 1.47E-05    | 4.37E-04        | Hsp90b1; Hspa5; Xbp1;                                                                               |
|                                             | Unfolded Protein Response (UPR)                        | 5           | 1.15E-05    | 5.10E-04        | Edem1; Hsp90b1; Hspa5; Hyou1; Xbp1;                                                                 |
|                                             | ATF6-alpha activates chaperones                        | 3           | 2.68E-05    | 5.96E-04        | Hsp90b1; Hspa5; Xbp1;                                                                               |
|                                             | Malaria                                                | 4           | 9.14E-05    | 0.001626369     | Itgb2; Met; Myd88; Tnf;                                                                             |
|                                             | Tristetraprolin (TTP) destabilizes mRNA                | 2           | 1.53E-04    | 0.002270271     | Mapkapk2; Zfp36;                                                                                    |
|                                             | Metabolism of proteins                                 | 10          | 3.99E-04    | 0.005071064     | Ace; B4galt5; Edem1; Fut8; Hsp90b1; Hspa5; Hyou1; Lman1; Ssr2; Xbp1;                                |
|                                             | Transport to the Golgi and subsequent modification     | 3           | 5.11E-04    | 0.005687354     | B4galt5; Fut8; Lman1;                                                                               |
|                                             | IRE1alpha activates chaperones                         | 3           | 0.001255271 | 0.011171914     | Edem1; Hyou1; Xbp1;                                                                                 |
|                                             | XBP1(S) activates chaperone genes                      | 3           | 0.001169782 | 0.011567842     | Edem1; Hyou1; Xbp1;                                                                                 |
|                                             | Asparagine N-linked glycosylation                      | 4           | 0.001710341 | 0.013838216     | B4galt5; Edem1; Fut8; Lman1;                                                                        |
|                                             | Leishmaniasis                                          | 3           | 0.004211903 | 0.026775672     | Itgb2; Myd88; Tnf;                                                                                  |
|                                             | N-glycan antennae elongation in the medial/trans-Golgi | 2           | 0.004153767 | 0.028437325     | B4galt5; Fut8;                                                                                      |
|                                             | Toll-Like Receptors Cascades                           | 4           | 0.003930678 | 0.02915253      | Hsp90b1; Lbp; Mapkapk2; Myd88;                                                                      |
|                                             | Asthma                                                 | 2           | 0.006066244 | 0.035993046     | Prg2; Tnf;                                                                                          |
|                                             | Antigen processing and presentation                    | 3           | 0.006564321 | 0.036514037     | H2-Q1; Hspa5; Tnf;                                                                                  |
| ZBP1(DAI) mediated induction of type I IFNs | 2                                                      | 0.007717074 | 0.040401153 | Myd88; Tmem173; |                                                                                                     |
